# Supplementary material for: Molecularly Architected Polymers Enabled by Frontal Polymerization
Source: Research Square preprint supplement (doi:10.21203/rs.3.rs-3777388/v1), 2024-01-26
Supplement: Supplementary file 2 [file 5820f92e735400f607026763.docx]

**SI Video Captions**

**Video 1 Uniform mode of frontal polymerization of COD with the Ru-1 initiator**

Planar front dynamics of COD with the Ru-1 initiator. The front propagates as a linear front in the X2 direction. The width of the specimen mold is 1.5 cm, and the front is initiated using a resistive wire. The ambient temperature is held constant at 20 °C. The video is presented at 3× speed. The scale bar is 5 mm.

**Video 2 Spin mode of frontal polymerization of COD with the Ru-1 initiator**

Nonplanar front dynamics of COD with the Ru-1 initiator. The front propagates as a single spin mode traversing in the X1 direction before propagating in the X2 direction. The width of the specimen mold is 1.5 cm, and the front is initiated using a resistive wire. The ambient temperature is held constant at 20 °C. The video is presented at 3× speed. The scale bar is 5 mm.

**Video 3 24 h time lapse of an architected specimen derived from the Ru-1 initiator**

The evolution of the architected material domains over the course of 24 h for a specimen derived from the Ru-1 initiator in a 1.5 cm wide mold. Images were captured every 30 minutes of the specimen in the glass mold at room temperature in a fume hood. The scale bar is 5 mm.

**Video 4 Spin mode of frontal polymerization in a 6 cm wide mold with the Ru-1 initiator**

Nonplanar front dynamics of COD with the Ru-1 initiator. Multi-head spin modes are observed colliding in the X1 direction before propagating in the X2 direction. The width of the specimen mold is 6 cm, and the front is initiated using a resistive wire. The ambient temperature is held constant at 20 °C. The video is presented at 4× speed. The scale bar is 1 cm.

**Video 5 Numerical simulation of spin mode of front propagation in a 0.5 cm wide mold**

Nonplanar front dynamics are observed via computational modelling of the Ru-1 experimental system. The width of the molds are 0.5 cm and 1.5 cm respectively. The ambient temperature is held constant at 25 °C. The video is presented in real time.

**Video 6 Spin mode of frontal polymerization of COD with the Ru-2 initiator**

Nonplanar front dynamics of COD with the Ru-2 initiator. Multi-head spin modes are observed propagating in the X1 direction before propagating in the X2 direction. The width of the specimen mold is 1.5 cm, and the front is initiated using a resistive wire. The ambient temperature is held constant at 30 °C. The video is presented at 3× speed. The scale bar is 5 mm.

**Video 7 Spin mode of frontal polymerization of COD with the Ru-3 initiator**

Nonplanar front dynamics of COD with the Ru-3 initiator. Multi-head spin modes are observed propagating in the X1 direction before propagating in the X2 direction. The width of the specimen mold is 1.5 cm, and the front is initiated using a resistive wire. The ambient temperature is held constant at 50 °C. The video is presented at 3× speed. The scale bar is 5 mm.

**Video 8 Uniaxial tensile testing of Ru-1 specimens**

Tensile testing of Ru-1 derived polymers at ambient temperature. Representative architected A1, architected A2, and a uniform type V dog-bone specimens. The architected specimens are presented at 50x speed. The uniform specimen is presented in real time. The scale bars are 5 mm. The red light observed in the videos is from the LED lighting equipped on the video extensometer.

**Video 9 Uniaxial tensile testing of a Ru-2 specimens**

Tensile testing of Ru-2 derived polymers at ambient temperature. Representative architected A1, architected A2, and a uniform type V dog-bone specimens. The architected specimens are presented at 3x speed. The uniform specimen is presented in real time. The scale bars are 5 mm. The red light observed in the videos is from the LED lighting equipped on the video extensometer.

**Video 10 Uniaxial tensile testing of a Ru-3 specimens**

Tensile testing of Ru-3 derived polymers at ambient temperature. Representative architected A1, architected A2, and a uniform type V dog-bone specimens. The architected specimens are presented at 4x speed. The uniform specimen is presented in real time. The scale bars are 5 mm. The red light observed in the videos is from the LED lighting equipped on the video extensometer.
