# Supplementary material for: Molecularly Architected Polymers Enabled by Frontal Polymerization
Source: Research Square preprint supplement (doi:10.21203/rs.3.rs-3777388/v1), 2024-01-26
Supplement: Supplementary file 3 [file 607116b91aafc353024265ff.docx]

**Extended Data Tables**

**Extended Data Table 1 | Initiator and inhibitor concentrations for spin and uniform modes of front propagation and the corresponding front velocity, maximum front temperature, and heat of reaction for a 5.29 g (6 mL) sample.**

| **Initiator** | **Mode of Front Propagation** | **Mass of initiator**  **(mg)** | **Initiator Concentration**  **(mmol)** | **Volume of Inhibitor**  **(μL)** | **Inhibitor Concentration (mmol)** | **Molar equiv. of Inhibitor to Initiator** | ***v*f**†  **(mm/sec)** | ***T*max**  **(°C)** | ***H*r**‡  **(J/g)** |
| --- | --- | --- | --- | --- | --- | --- | --- | --- | --- |
| Ru-1 | Spin | 7.68 | 0.0090 | 5.0 | 0.018 | 2.0 | 0.45  ± 0.03 | 159  ± 4 | 298.2  ± 4.5 |
| Ru-1 | Uniform | 7.68 | 0.0090 | 2.5 | 0.0092 | 1.0 | 0.41  ± 0.01 | 158  ± 6 | 305.6  ± 6.3 |
| Ru-2 | Spin | 7.20 | 0.0087 | 4.0 | 0.015 | 1.7 | 0.28  ± 0.03 | 152  ± 3 | 290.8  ± 5.8 |
| Ru-2 | Uniform | 7.20 | 0.0087 | 2.0 | 0.0074 | 0.85 | 0.33  ± 0.02 | 158  ± 2 | 303.4  ± 7.1 |
| Ru-3 | Spin | 8.40 | 0.0089 | 2.4 | 0.0089 | 1.0 | 0.26  ± 0.02 | 153  ± 1 | 304.9 ± 5.9 |
| Ru-3 | Uniform | 8.40 | 0.0089 | 1.2 | 0.0044 | 0.50 | 0.23  ± 0.02 | 157  ± 2 | 306.3  ± 8.5 |
| Ru-3* | Spin | 16.80 | 0.018 | 1.2 | 0.0044 | 0.25 | 0.28  ± 0.03 | 156  ± 2 | 305.1  ± 7.6 |

Vf: front speed; Tmax: maximum front temperature; Hr: heat of reaction

Reported values and error bars represent the average and standard deviation, respectively for a *n=3*.

* Representsthe resin formulation for successful spin mode propagation of Ru-3 at ambient temperatures below 40 °C.

† Front temperatures and velocities are highly dependent on the material and geometrical conditions used for manufacturing. The values reported here correspond to the experimental conditions described in the Methods section.

‡ The heat of reaction was measured from differential scanning calorimetry dynamic scans at a rate of 5 °C/min.

**Extended Data Table 2 | Physical and thermal properties of COD and silicone rubber used in numerical modeling.**

|  | ***κ***  **(W m-1 K-1)** | ***ρ***  **(kg m-3)** | ***H*r**  **(J g-1)** | ***Cp***  **(J kg-1 K-1)** | ***A***  ***(*s-1*)*** | ***E***  ***(kJ mol-1)*** | ***n*** | ***m*** |
| --- | --- | --- | --- | --- | --- | --- | --- | --- |
| **COD (r)** | 0.133 | 882 | 259 | 1,838 | 1.57 x 1017 | 117.45 | 2.60 | 0.83 |
| **Silicone rubber (s)** | 1.0 | 1,500 | - | 1,200 | - | - | - | - |

**Extended Data Table 3 | Comparison of the percent distribution of polymer chains for specimens derived from the three ruthenium initiators and by different modes of front propagation.**

| **Initiator** | **Specimen Type** | **Ambient Temperature**  **(°C)** | **Percent Distribution**  **θ = 0°** | **Percent Distribution**  **θ = ± 90°** |
| --- | --- | --- | --- | --- |
| Ru-1 | Architected | 25 | 45.5 | 54.5 |
| Ru-2 | Architected | 25 | 41.6 | 58.4 |
| Ru-3 | Architected | 25 | 36.2 | 63.0 |
| Ru-1 | Uniform | 20 | 33.0 | 67.0 |
| Ru-2 | Uniform | 30 | 44.0 | 56.0 |
| Ru-3 | Uniform | 50 | 41.3 | 58.7 |

| **Initiator** | **Specimen Type** | **Specimen Orientation** | **Ambient Temperature**  **(°C)** | **Elastic Modulus (GPa)** | **Tensile Strength (MPa)** | **Strain Energy Density**  **(MJ/m3)** | **Strain to Failure**  **(mm/mm)** |
| --- | --- | --- | --- | --- | --- | --- | --- |
| Ru-1 | Architected | 1 | 20 | 0.1  ± 0.008 | 4.2  ± 0.2 | 1.4  ± 0.3 | 1.0  ± 0.2 |
| Ru-1 | Architected | 2 | 20 | 0.1  ± 0.008 | 4.0  ± 0.2 | 1.5  ± 0.2 | 1.1  ± 0.1 |
| Ru-2 | Architected | 1 | 30 | 0.2  ± 0.01 | 5.2  ± 0.4 | 0.2  ± 0.1 | 0.1  ± 0.02 |
| Ru-2 | Architected | 2 | 30 | 0.2  ± 0.01 | 5.8  ± 0.6 | 0.4  ± 0.1 | 0.1  ± 0.06 |
| Ru-3 | Architected | 1 | 40 | 0.3  ± 0.02 | 7.6  ± 0.5 | 0.4  ± 0.1 | 0.1  ± 0.005 |
| Ru-3 | Architected | 2 | 40 | 0.7  ± 0.05 | 11.1  ± 0.4 | 0.5  ± 0.1 | 0.1  ± 0.01 |
| Ru-1 | Uniform | 1 | 20 | 0.8  ± 0.08 | 12.2  ± 0.5 | 0.6  ± 0.3 | 0.1  ± 0.01 |
| Ru-1 | Uniform | 2 | 20 | 0.6  ± 0.03 | 10.1  ± 0.9 | 0.3  ± 0.1 | 0.04  ± 0.004 |
| Ru-2 | Uniform | 1 | 30 | 0.6  ± 0.02 | 9.8  ± 0.1 | 0.3  ± 0.1 | 0.04  ± 0.006 |
| Ru-2 | Uniform | 2 | 30 | 0.7  ± 0.05 | 10.0  ± 0.7 | 0.3  ± 0.1 | 0.04  ± 0.008 |
| Ru-3 | Uniform | 1 | 40 | 0.8  ± 0.08 | 11.4  ± 0.8 | 0.2  ± 0.02 | 0.03  ± 0.002 |
| Ru-3 | Uniform | 2 | 40 | 0.8  ± 0.08 | 10.2  ± 0.3 | 0.2  ± 0.02 | 0.03  ± 0.004 |

**Extended Data Table 4 | Comparison of the mechanical properties for specimens derived from the three ruthenium initiators and by different modes of front propagation.**

Reported values and error bars represent the average and 95% confidence interval, respectively, for a *n=5*.
